# Supplementary material for: An efficient mixed micellar strategy for the catalytic oxidation of benzyl alcohol by diperiodatoargentate(iii) in aqueous media
Source: Royal Society of Chemistry journal article supplement (doi:10.1039/d3nj02023a), 2023-01-01
Supplement: d3nj02023a1.pdf [file d3nj02023a1.pdf]

## Supplementary

### An efficient mixed micellar strategy for the catalytic oxidation of benzyl alcohol by doperiodatoargentate(III) in aqueous media

Priya Karmakar<sup>a</sup>, Sandip Kundu<sup>a</sup>, Mousumi Layek<sup>a</sup>, Kripasindhu Karmakar<sup>a</sup>, Mandira Mitra<sup>a</sup>, Arnab Mukherjee<sup>b</sup>, Debasis Dhak<sup>b</sup>, Ujjwal Mandal<sup>a,\*</sup>, Pintu Sar<sup>a,\*</sup>, Bidyut Saha<sup>a,\*</sup>

<sup>a</sup>Surfactant Chemistry Laboratory, Department of Chemistry, The University of Burdwan, Burdwan-713104, West Bengal, India

<sup>b</sup>Department of Chemistry, Sidho-Kanho-Birsha University, Purulia-723104, West Bengal, India

\*Corresponding authors

Email addresses: [umandal@chem.buruniv.ac.in](mailto:umandal@chem.buruniv.ac.in) (UM), [pintusar1@gmail.com](mailto:pintusar1@gmail.com) (PS), [b\\_saha31@redifmail.com](mailto:b_saha31@redifmail.com) (BS), [bsaha@chem.buruniv.ac.in](mailto:bsaha@chem.buruniv.ac.in) (BS)

## Content

| Figure no. | Figure caption                                                                                                                                       | Page no. |
|------------|------------------------------------------------------------------------------------------------------------------------------------------------------|----------|
| Figure S1  | The FT-IR spectrum of phenylhydrazone derivative of benzaldehyde.                                                                                    | 2        |
| Figure S2  | The <sup>1</sup> H NMR spectrum of isolated oxidized product (benzaldehyde).                                                                         | 3        |
| Figure S3  | CMC determination of CPC and Brij-35 surfactants by conductometric and fluorometric plots.                                                           | 4        |
| Figure S4  | The integrated <sup>1</sup> H NMR spectrum of CPC/Brij-35 binary surfactants in D <sub>2</sub> O solvent                                             | 5        |
| Figure S5  | UV-Vis spectra of DPA in presence of surfactants only.                                                                                               | 6        |
| Figure S6  | Sequential scanned absorption spectra of DPA directed oxidation of benzyl alcohol in aqueous media at with varying Brij-35 surfactant concentration. | 7        |
| Figure S7  | Sequential scanned absorption spectra of DPA directed oxidation of benzyl alcohol in aqueous media at with varying CPC concentration.                | 8        |
| Figure S8  | The representative plots for the studied oxidation kinetics in presence of mixed micelle.                                                            | 9        |
| Figure S9  | <sup>1</sup> H NMR spectrum of benzyl alcohol itself and mixed surfactants with benzyl alcohol.                                                      | 10       |
| Figure S10 | The size of various micellar nanoaggregates.                                                                                                         | 11       |
| Table S1   | Chemical shift values of CPC, Brij-35, and mixture of CPC and Brij-35                                                                                | 12       |

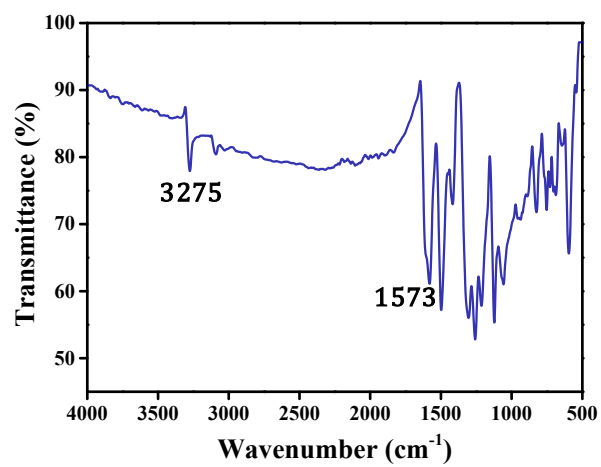

Figure S1. The FT-IR spectrum of phenylhydrazone derivative of isolated oxidized product.

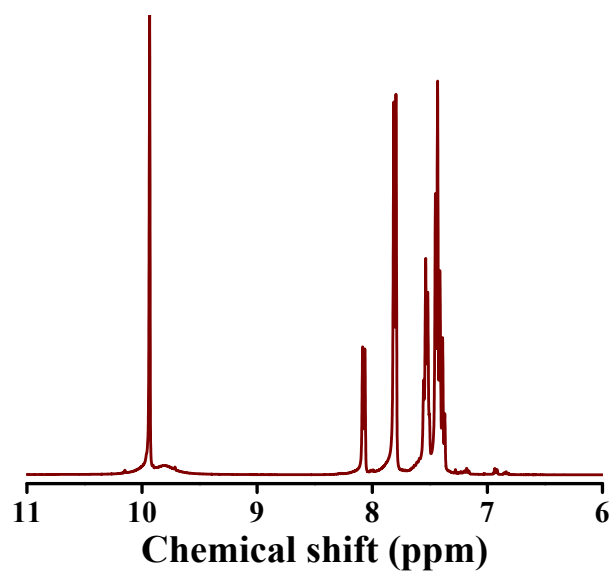

Figure S2.  $^1\text{H}$  NMR spectrum of isolated oxidized product.

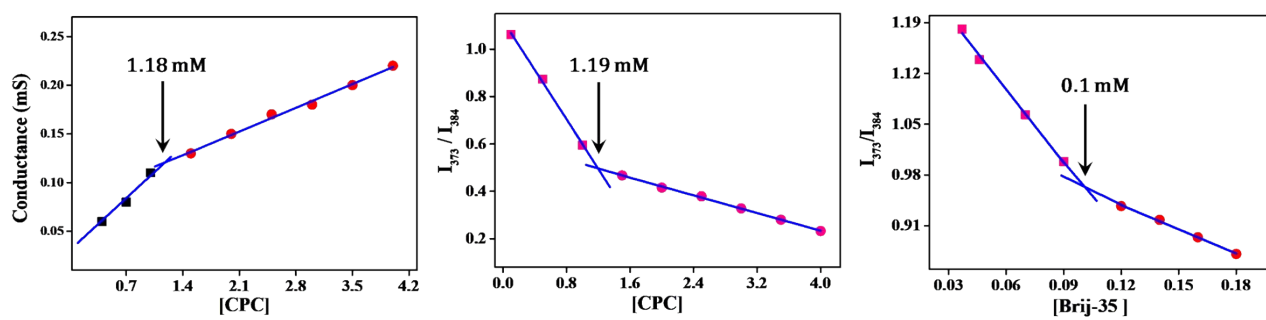

Figure S3: The conductometric and fluorometric plots of CMC determination of CPC and Brij-35 surfactants.

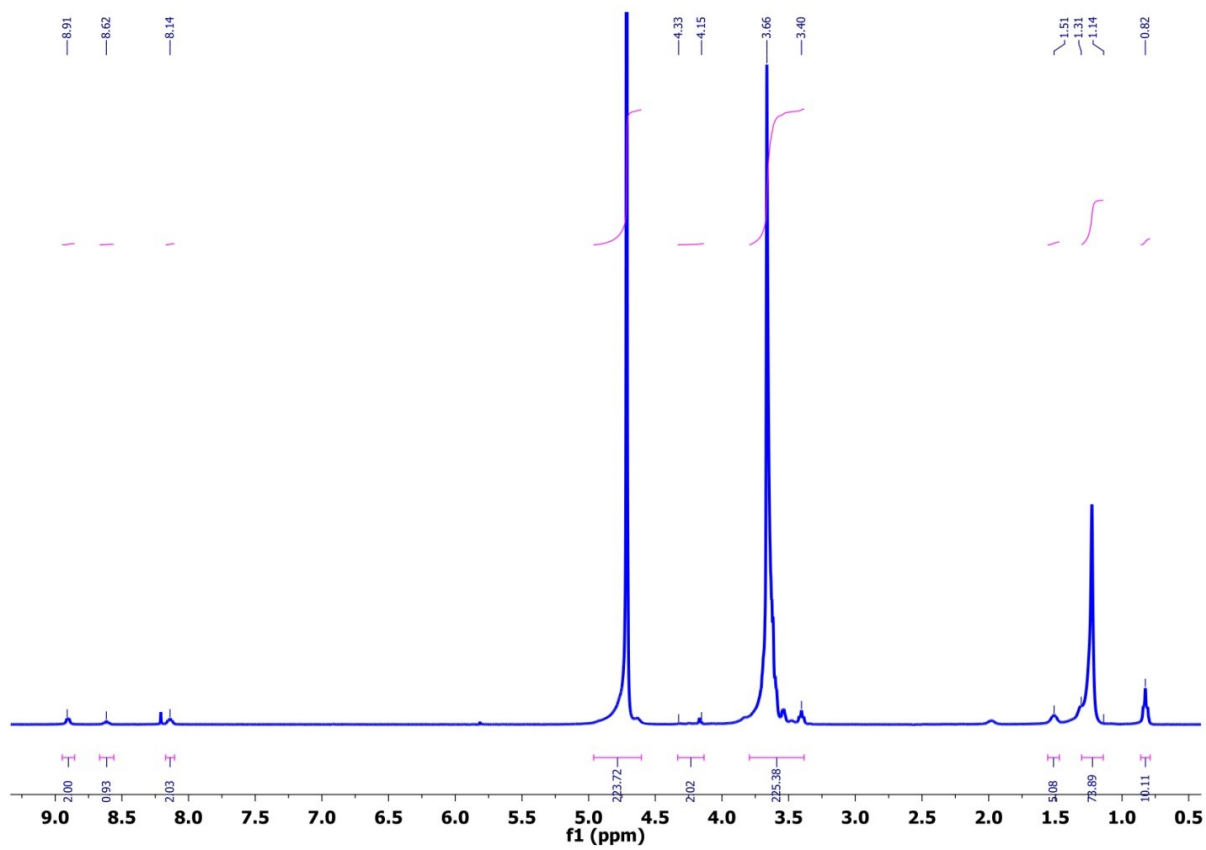

Figure S4. The integrated  $^1\text{H}$  NMR spectrum of CPC/Brij-35 binary surfactants in  $\text{D}_2\text{O}$  solvent.

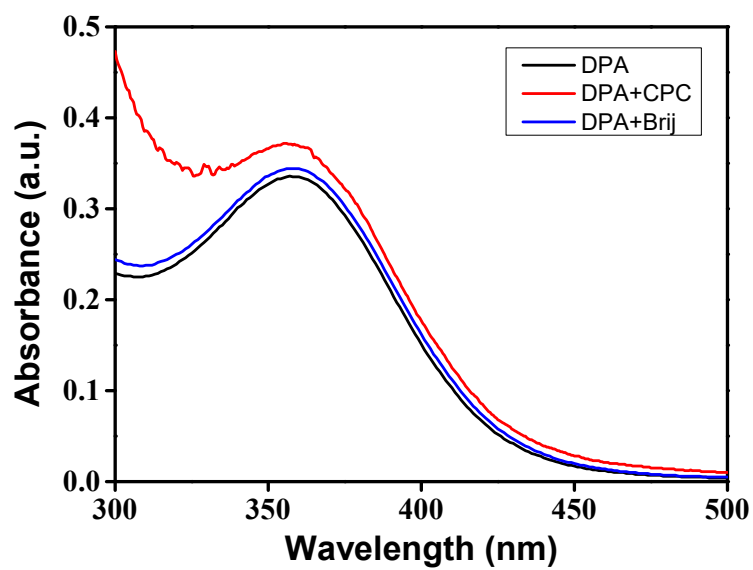

Figure S5. UV-Vis spectra of DPA [ $2.72 \times 10^{-2}$  mM] alone and in presence of studied surfactants CPC [1 mM], and Brij-35 [1 mM].

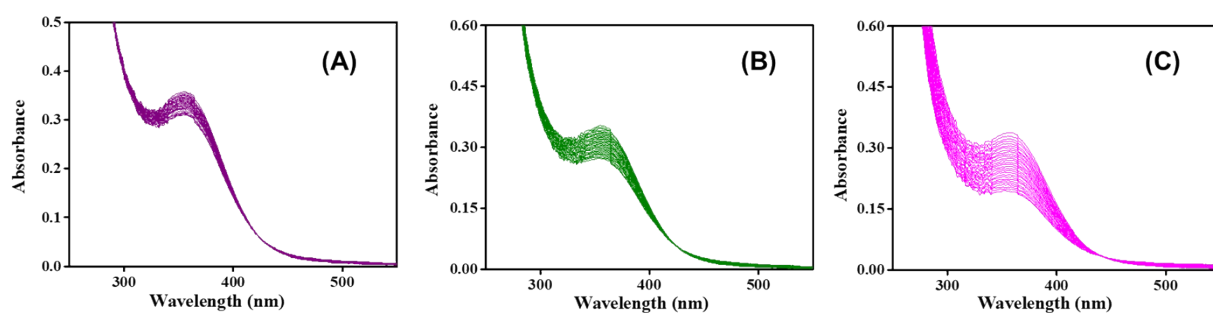

Figure S6. Sequential scanned absorption spectra of DPA directed oxidation of benzyl alcohol in aqueous media at 3 min interval in presence of 1 mM Brij-35 (A), 2 mM Brij-35 (B), and 3 mM Brij-35 (C). Condition: [benzyl alcohol] =  $2.72 \times 10^{-1}$  mM, [DPA] =  $2.72 \times 10^{-2}$  mM, T = 30 °C.

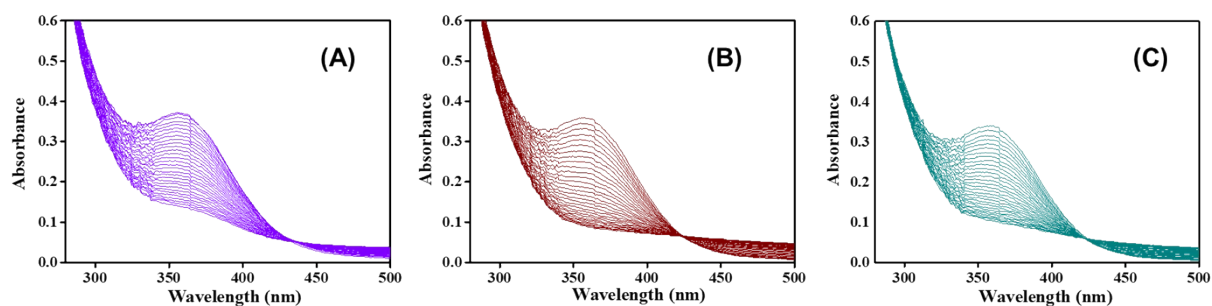

Figure S7. UV-vis scanned absorption spectra of benzyl alcohol oxidation by DPA in presence of CPC surfactant at 3 min interval for 1 mM CPC (A), 2 mM CPC (B), and 2 min interval for 3 mM CPC (C). Condition: [benzyl alcohol] =  $2.72 \times 10^{-1}$  mM, [DPA] =  $2.72 \times 10^{-2}$  mM, T = 30 °C.



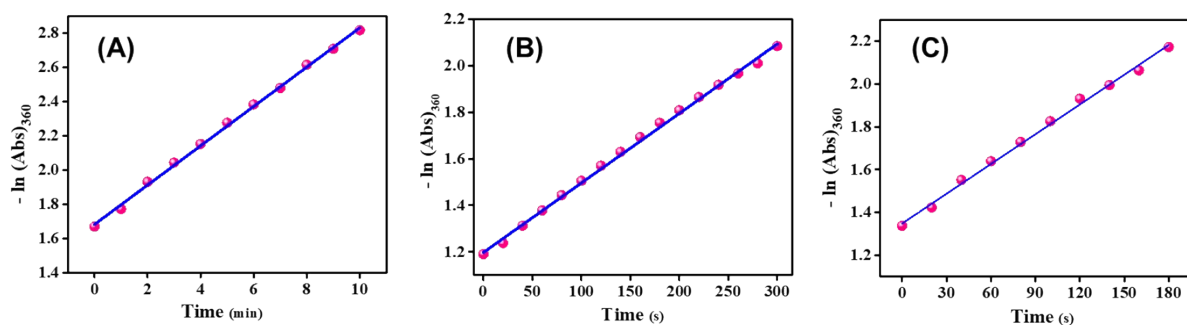

Figure S8. The representative plot of  $-\ln(\text{Abs})_{360}$  vs time for the studied oxidation kinetics in presence of mixed micelle constituted by CPC:Brij-35 having mole fraction ratio 3:1 (A), 1:3 (B), and 2:2 (C).

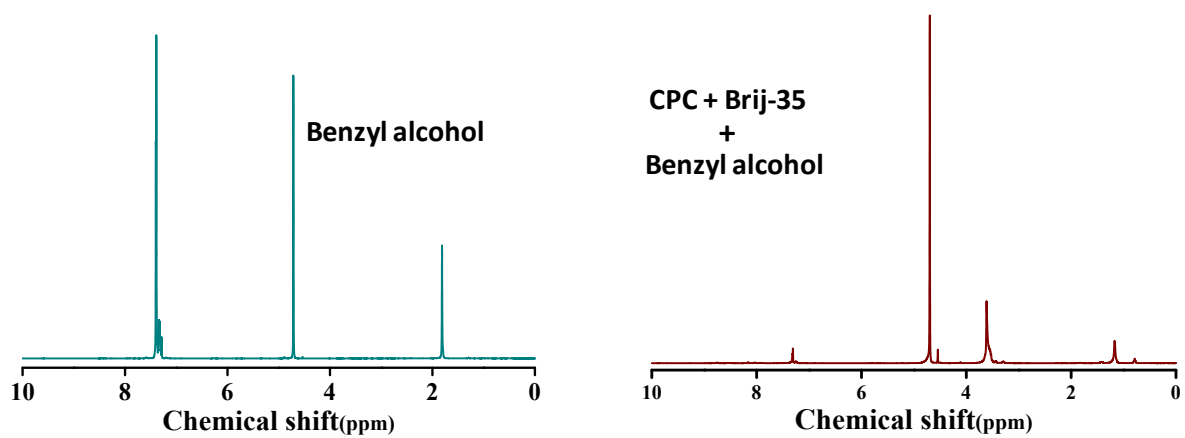

Figure S9:  $^1\text{H}$  NMR spectrum of mixed surfactants with benzyl alcohol and benzyl alcohol itself respectively.

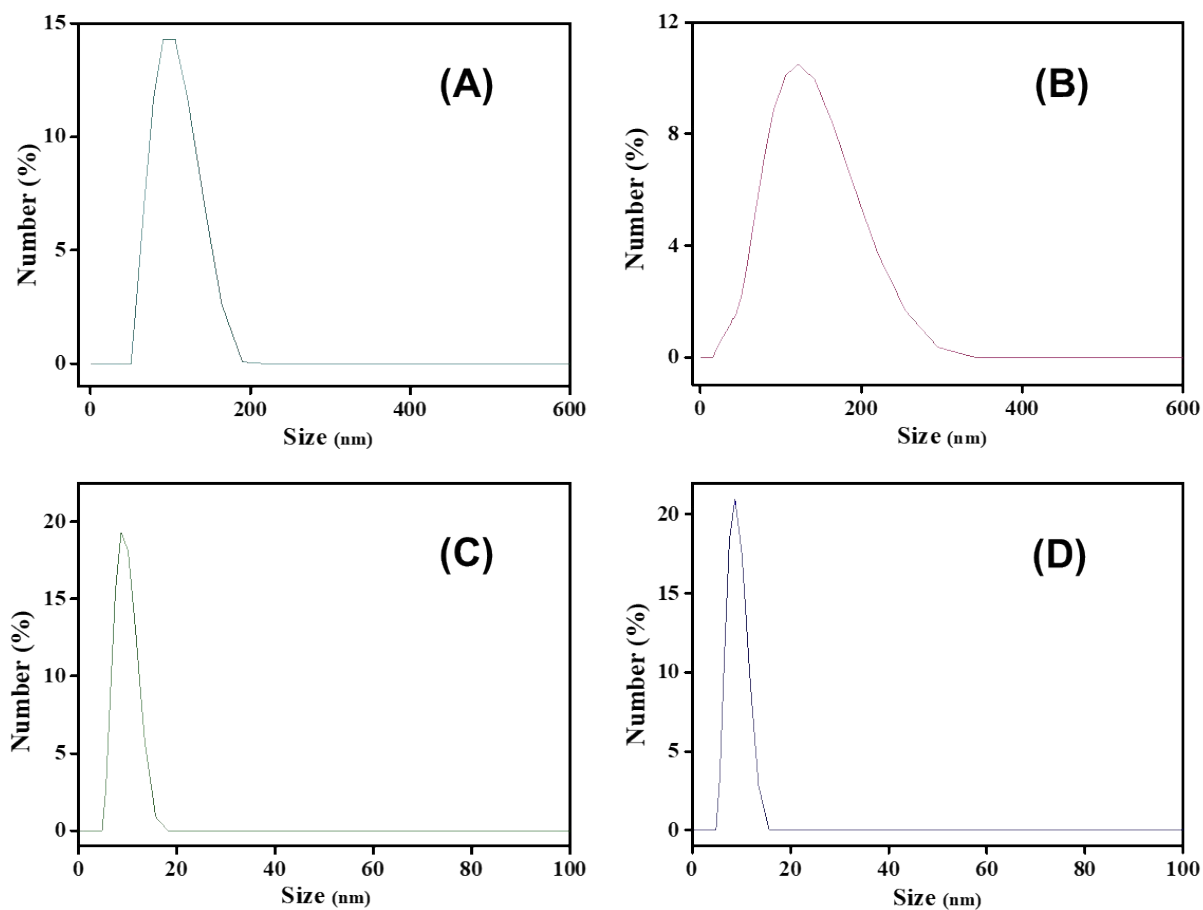

Figure S10. The size of micellar nanoaggregates of CPC (A) and Brij-35 (C) surfactants in aqueous media and the alteration of hydrodynamic diameter observed in presence of benzyl alcohol for CPC (B) and Brij-35 (D) surfactants.

Table S1. <sup>1</sup>H NMR values of CPC, Brij-35, and mixture of CPC and Brij-35.

| Compositions  | a-H's | b-H's     | c-H's | d-H's     | m-H's | bulk-H's  | p-H's     | q-H's | r-H's | s-H's | t-H's |
|---------------|-------|-----------|-------|-----------|-------|-----------|-----------|-------|-------|-------|-------|
| CPC           |       |           |       |           | 0.68  | 1.08-1.27 | 4.69      | 1.96  | 8.95  | 8.09  | 8.57  |
| Brij-35       | 0.85  | 1.26      | 1.53  | 3.55-3.76 |       |           |           |       |       |       |       |
| CPC + Brij-35 | 0.82  | 1.13-1.36 | 1.53  | 3.40-3.66 | 0.82  | 1.13-1.36 | 4.15-4.32 | 1.98  | 8.90  | 8.14  | 8.62  |
